1 **Forest loss as a catalyst of population and biodiversity change**

2

3 Gergana N. Daskalova<sup>1\*</sup>, Isla H. Myers-Smith<sup>1</sup>, Anne D. Bjorkman<sup>3</sup>, Sarah R. Supp<sup>4</sup>, Shane A.  
4 Blowes<sup>5</sup>, Anne Magurran<sup>2</sup>, Maria Dornelas<sup>2</sup>

5

6 <sup>1</sup>School of GeoSciences, University of Edinburgh, West Mains Road, Edinburgh EH9 3FF, Scotland

7 <sup>2</sup>Centre for Biological Diversity, University of St Andrews, Greenside Place, St Andrews KY16 9TF,  
8 Scotland

9 <sup>3</sup>Senckenberg Biodiversity and Climate Research Centre, Frankfurt D-60325, Germany

10 <sup>4</sup>Data Analytics Program, Denison University, Granville, OH 43023, USA

11 <sup>5</sup>German Centre for Integrative Biodiversity Research (iDiv), Leipzig 04103, Germany

12

13 \* Corresponding author

14 Gergana Daskalova

15 Crew Building, School of GeoSciences

16 University of Edinburgh

17 West Mains Road, Scotland

18 [gndaskalova@gmail.com](mailto:gndaskalova@gmail.com)

19

20 **Keywords:** forest cover change, forest loss, populations, species richness, turnover, biodiversity

21 change, attribution

22

23 Main text word count: 1,843

24 Methods word count: 4,272

25 Figures: 4

26 Extended Data Figures: 10

27 Extended Data Tables: 1

## 28 **Summary**

29 Accelerating human impacts are reshaping Earth's ecosystems. Populations<sup>1</sup>, richness<sup>2-4</sup> and  
30 composition<sup>4</sup> of communities at sites around the world are being altered over time in complex  
31 and heterogeneous ways<sup>5-7</sup>. Land-use change is thought to be the greatest driver of this  
32 population and biodiversity change in terrestrial ecosystems<sup>8-10</sup>. However, a major knowledge  
33 gap is whether land-use change drivers, such as forest loss and habitat conversion, can indeed  
34 explain the high heterogeneity of temporal population and biodiversity trends<sup>9,11</sup>. Here, we fill  
35 this gap by analysing change in 6,667 time series of populations (species' abundance)<sup>12</sup> and  
36 biodiversity (species richness and turnover in ecological communities)<sup>13</sup> over one and a half  
37 centuries of forest cover change and habitat transitions. We revealed an acceleration in both  
38 increases and decreases in population size, species richness and turnover after peak forest  
39 loss at over 2,000 sites across the globe. We found that temporal lags in population and  
40 biodiversity change following forest loss can extend up to half of a century and were longer for  
41 species with longer generation times such as large mammals. Together, our results  
42 demonstrate that historic and contemporary forest cover change do not universally lead to  
43 population declines and biodiversity loss, though population declines were most pronounced  
44 during and immediately following peak forest loss. By explicitly quantifying multi-decadal  
45 temporal lags in population and biodiversity responses to land-use change, our findings inform  
46 projections of how life on Earth will be reshaped across the Anthropocene.

47

## 48 **Main text**

49 Earth's biodiversity is changing<sup>3-5,14</sup>. At sites across the planet, populations are increasing and  
50 decreasing<sup>1,15,16</sup>, species are lost<sup>17</sup> and gained<sup>18,19</sup>, yet synthesis studies across sites indicate  
51 no net change in local scale species richness<sup>3,4</sup> despite marked shifts in species composition  
52 (turnover)<sup>2,4,5</sup>. At present, we have only a limited understanding of how global change drivers

53 produce these complex population and biodiversity patterns over time<sup>6,20,21</sup>. Our current  
54 knowledge of the mechanisms explaining the ongoing reorganisation of ecological communities  
55 predominantly stems from space-for-time<sup>8,22</sup> and modelling<sup>23,24</sup> approaches that attribute  
56 population and richness declines to land-use change. Yet, space-for-time methods can  
57 overestimate the effects of global change drivers compared to long-term monitoring, because  
58 they do not account for ecological lags<sup>6,25,26</sup> and community self-regulation<sup>27</sup>. Such temporal  
59 discrepancies in the magnitude of effects have been observed when studying the impacts of  
60 warming on community change<sup>25</sup>, and of habitat fragmentation on populations and  
61 biodiversity<sup>28,29</sup>. The integration of multi-century long reconstructions of past land cover<sup>30</sup> and  
62 high-resolution remote-sensing observations<sup>31,32</sup> with recent compilations of over five million  
63 population and biodiversity records<sup>12,13</sup> provides an unprecedented opportunity to test the *in-*  
64 *situ* impacts of land-use change. Only now can we quantitatively attribute the heterogeneous  
65 patterns of population and biodiversity change observed over time to land-use dynamics, thus  
66 improving projections of human impacts on the world's biota.

67

68 Here, we asked how populations (trends in numerical abundance) and biodiversity (trends in  
69 species richness and community composition) across vertebrate, invertebrate and plant taxa  
70 vary according to the timing and magnitude of forest cover change and habitat conversions  
71 (Figure 1, Extended Data Figures 1 and 3b). We assessed whether population and biodiversity  
72 change were different after versus before contemporary peak forest loss (the timing of the  
73 largest forest loss event across the duration of each time series). Additionally, we tested  
74 population and biodiversity change versus overall forest cover gain and loss experienced across  
75 the duration of each time series. In a *post-hoc* analysis, we categorized population time series  
76 based on whether they were recorded before, during, or after the period of all-time historic peak  
77 forest loss (the timing of the largest forest loss event at the location of each time series between

78 the years 850 and 2015), and then compared population trends among the three categories.  
79 Finally, we investigated among-taxa variation in temporal lags of population and biodiversity  
80 responses to peak forest (the time period between contemporary peak forest loss and maximum  
81 change in populations and communities). We used a hierarchical Bayesian modelling  
82 framework for all attribution analyses, with individual time series nested within biomes<sup>33</sup> to  
83 account for the spatial and temporal structure of the data. We used the Living Planet Database  
84 (133,092 records) and the BioTIME database (4,970,128 records), currently the two largest  
85 databases of population and community time series, respectively. We calculated population  
86 change using state-space models that account for observation error and random fluctuations<sup>34</sup>.  
87 We quantified turnover by partitioning Jaccard's dissimilarity measure into its nestedness  
88 (change due to communities becoming reduced subsets of themselves or new species  
89 colonising in addition to the original species) and turnover<sup>35</sup> components. We focused on  
90 turnover because it quantifies compositional changes due to species replacement and is  
91 independent of changes in species richness. Our data synthesis quantitatively tests the  
92 attribution of change in populations and ecological communities to land-use change through  
93 time across the world's woody biomes.

94

95 We predicted greater population and species richness declines with increased forest loss.  
96 Forest degradation and land-use conversion reduce habitat and resource availability<sup>8,19,36</sup> and  
97 are the most common global threats for our studied species<sup>37</sup> (Figure 1b, Extended Data Figure  
98 4e). Conversely, we predicted greater increases in population abundance and species richness  
99 with larger gains in forest cover. Forest restoration and natural regeneration, two examples of  
100 forest cover gain, can lead to positive biodiversity responses<sup>38,39</sup>. We expected greater turnover  
101 of species within ecological communities with greater change in forest cover (both loss and  
102 gain), as these extremes of the forest cover change spectrum both create novel environmental

103 conditions prompting local extinctions but also colonisations by new species<sup>27,36</sup>. Secondly, we  
104 predicted that the largest population declines will occur during the periods of all-time peak forest  
105 loss across sites as that is the baseline for maximum intensity of forest cover change<sup>26</sup>. Finally,  
106 we predicted that temporal lags will be greater for species with longer generation times, as they  
107 typically respond more slowly to environmental change<sup>40</sup> and have more limited dispersal<sup>41</sup>. If  
108 we find support for our overall prediction that population and biodiversity loss will be greater  
109 with higher forest loss, this would indicate that forest loss is a key driver of rapid and pervasive  
110 declines over time. Alternatively, if we find support for heterogeneous and temporally-delayed  
111 responses of populations and ecological communities to forest loss, this would imply that the  
112 effects of land-use change over time are more complex than previously thought, which has  
113 implications for improved prediction of future ecological change and development of biodiversity  
114 and conservation policy.

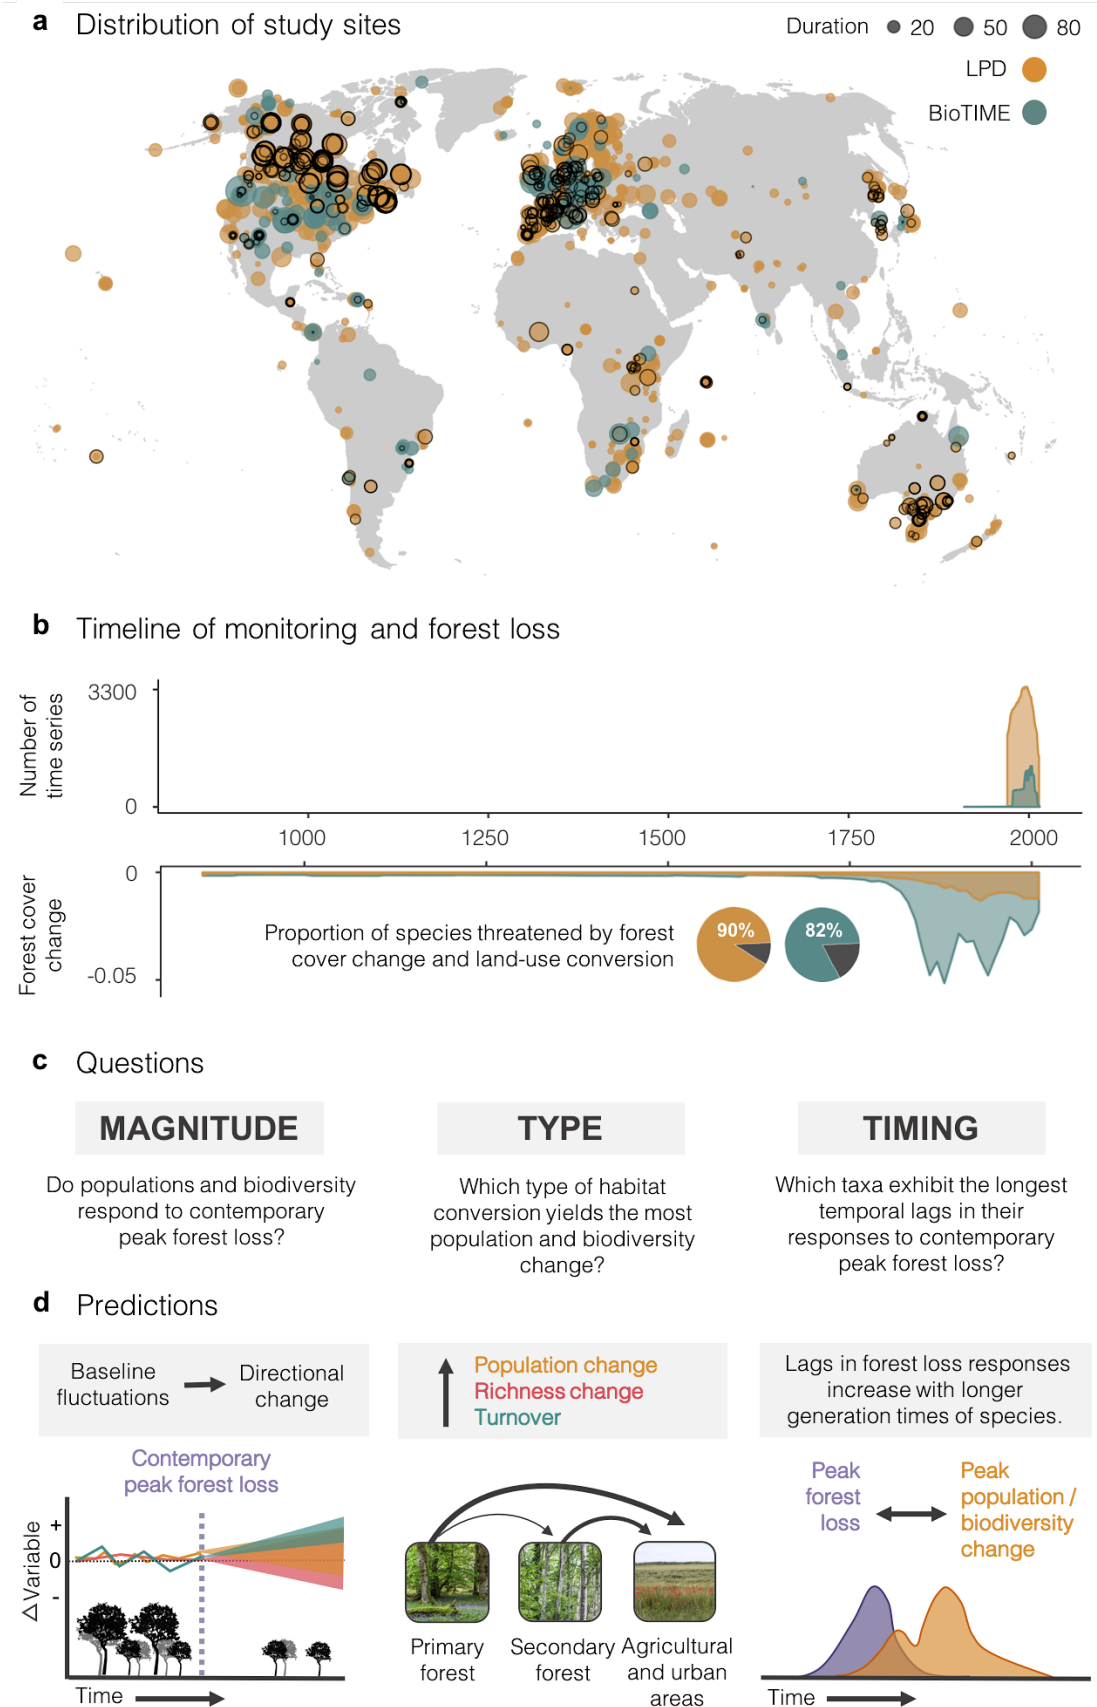

116 **Figure 1. Forest cover change can influence population and biodiversity change through**  
117 **multiple mechanisms.** For 38% of population time series and 70% of biodiversity time series  
118 monitoring began after historic peak forest loss had already occurred (see Extended Data  
119 Figures 2-3, 4a-b). See Extended Data Figure 1 for workflow of analyses. **a**, Global map of  
120 locations and duration of 542 Living Planet Database (LPD) and 190 BioTIME studies,  
121 containing the 6,497 time series from 2,154 locations analysed here. From the total number of  
122 time series analysed, 2,852 had experienced historic or contemporary forest cover gains and  
123 losses. Black outlines on **a** indicate locations that were forested at the start of the population  
124 or biodiversity monitoring period (1,247 sites). **b**, Timeline of monitoring and forest loss across  
125 the LPD and BioTIME databases (for variation in monitoring duration among time series, see  
126 Extended Data Figures 2-4). Forest loss was quantified over 10-year periods across 96 km<sup>2</sup>  
127 cells as a proportion, with e.g., -0.05 meaning a 5% loss of forest cover. Inset on **b** shows the  
128 proportion of species, part of the LPD and BioTIME databases, that are threatened by land-use  
129 change, based on species' IUCN threat assessments (see Extended Data Figure 4e). **c-d**,  
130 Questions and predictions for this study outlined with respect to population change, richness  
131 change and turnover (species composition change). Habitat conversion refers to a change in  
132 the dominant land cover type. Photos in **d** are by G. N. Daskalova.

133

134 We found that forest loss and habitat transitions did not universally lead to population declines  
135 and biodiversity loss (Figures 2-3) and are instead reshaping populations and ecological  
136 communities in more complex ways than previously recognised<sup>8,15,22,24</sup>. Surprisingly, forest loss  
137 acted as a catalyst for both positive and negative change and intensified population declines,  
138 population increases and species richness losses over time, despite equally long monitoring  
139 periods before and after peak forest loss. In 72% of the populations which were in decline before  
140 peak forest loss, the declines became more acute after forest loss (slope = -0.04 CI = -0.04 to

141 -0.03, Figure 2a). Similarly, 66% of the increasing populations experienced even more positive  
142 population change after peak forest loss (slope = 0.02, CI = 0.02 to 0.03, Figure 2b). In contrast,  
143 among time series, we did not find directional relationships among greater forest loss and  
144 population and species richness declines (Figure 3, Extended Data Figures 5-7). This  
145 disconnect between the magnitude of land-use change and population and biodiversity change  
146 could be due to a number of factors including temporal lags in population or community  
147 responses<sup>26,40</sup> and/or less forest cover change having occurred during the monitoring period  
148 relative to historic forest clearing<sup>26,42,43</sup> (Extended Data Figures 2-3). In further contrast to our  
149 first prediction, larger magnitudes of forest loss often led to greater increases, rather than  
150 decreases, in species richness over time, particularly among time series comparisons with  
151 shorter durations (Extended Data Figure 6e). Forest loss is a key driver of habitat fragmentation  
152 which can lead to rapid colonisation by new species due to increased landscape heterogeneity  
153 and larger breadth of ecological niches across sites<sup>5,28,36</sup>. Our results highlight that the same  
154 global change driver, forest loss, affects populations and ecological communities in  
155 heterogeneous ways at different sites around the world, and accounting for this heterogeneity  
156 is key when scaling from local impacts of human activities to global scale biodiversity patterns  
157 and attribution of change<sup>10</sup>.



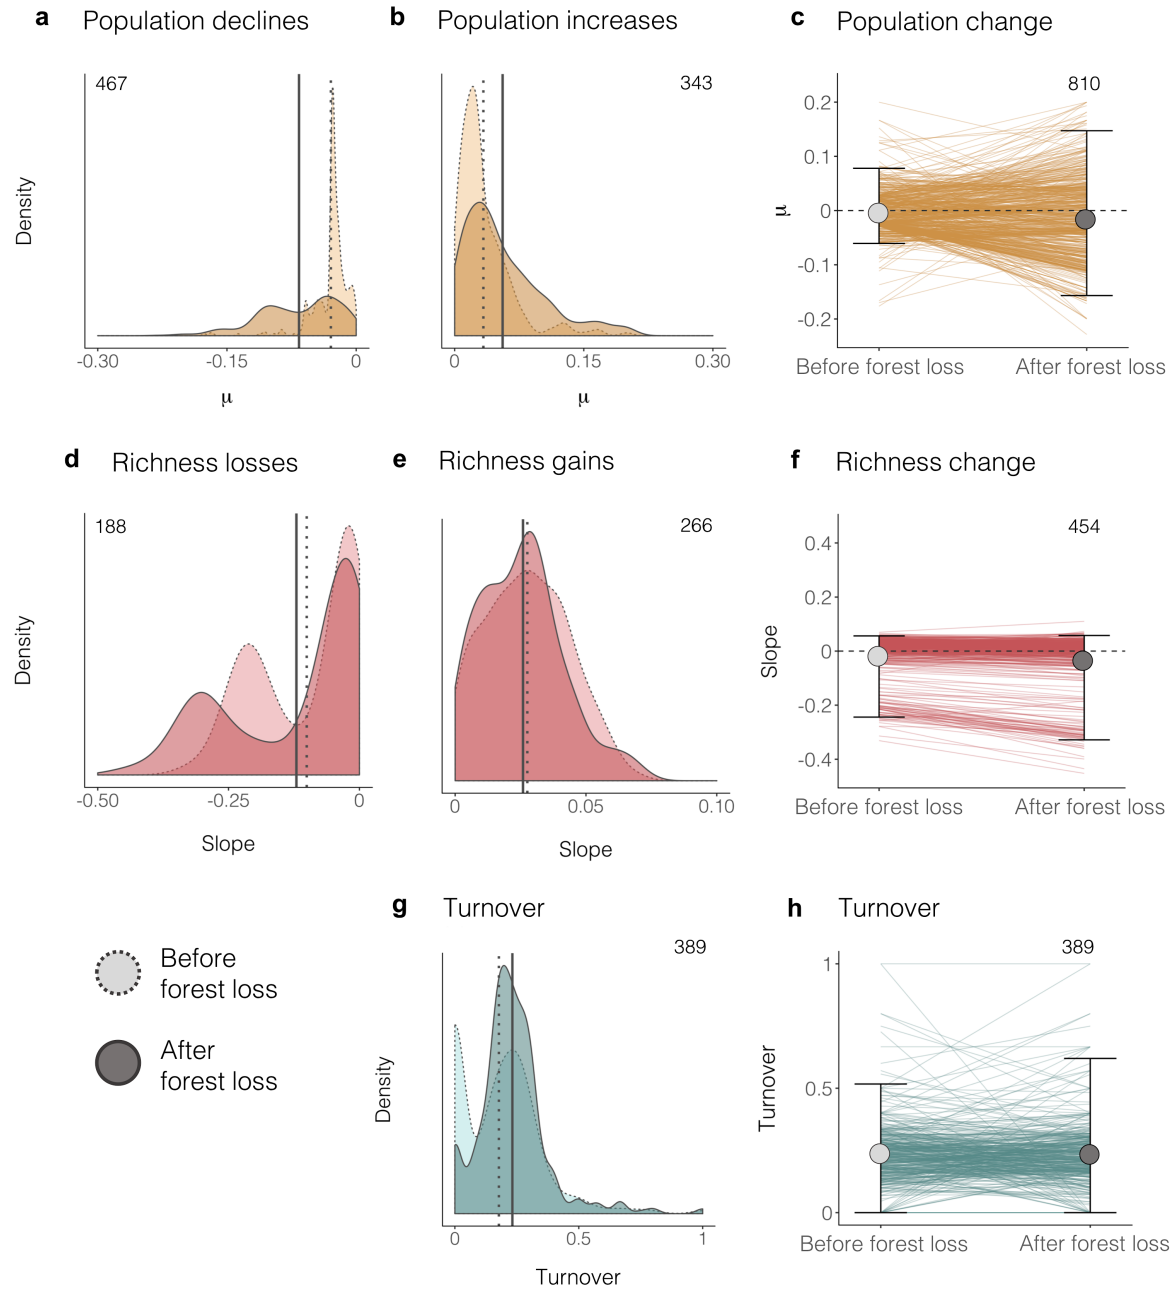

158

159 **Figure 2. At the site level, population and biodiversity change increase after**  
 160 **contemporary peak forest loss.** Though species richness tended to decrease after peak forest  
 161 loss, the proportion of populations that experienced increases and declines in population  
 162 abundance and turnover were similar. Numbers on plots indicate number of time series.  
 163 Population, richness and turnover change increased across 55% of the 1,007 time series for

164 which baseline comparisons were possible. Distributions show posterior means from model fits  
165 of **a**, population declines ( $\mu$ ), **b**, population increases ( $\mu$ ), **d**, richness losses (slopes), **e**, richness  
166 gains (slopes) and **g**, turnover (in the final year of each period relative to the first year, measured  
167 as Jaccard's dissimilarity, where zero indicates no changes in species composition and one  
168 indicates a completely new set of species). Vertical lines indicate the mean for each category.  
169 The y-axis on **a**, **b** and **c** refers to the probability density function for the kernel density estimation  
170 per unit on the x-axis, and the distributions are relative to one another. Temporal change before  
171 and after peak forest loss, **c**, **f**, **h** is indicated with lines for individual time series. The time  
172 window duration varied among time series but was consistent at the time series level ( $n$  years  
173 before disturbance =  $n$  years after disturbance at the time series level,  $n \geq 5$  years). Light grey  
174 and dark grey points indicate the mean values across all times series, with error bars indicating  
175 the 2.5 and 97.5% quantiles. See Extended Data Table 1 for model outputs.

176

177 Our results revealed that population declines were most pronounced during the period of all-  
178 time peak forest loss and turnover was highest when primary forests were converted to  
179 agricultural and urban areas (Figure 3). Following peak contemporary forest loss, turnover  
180 increased by over 10% in 19% of the time series (Figure 2), further testifying to the high rates  
181 of compositional change detected across the Anthropocene<sup>4,5,14</sup>. However, within 22% of the  
182 time series, turnover declined by over 10% after forest loss, suggesting that biotic  
183 homogenisation might also be occurring following human-induced environmental change<sup>44</sup>.  
184 Taken together, our findings suggest site-specific impacts that were stronger and more common  
185 when the population and biodiversity monitoring captured the largest forest loss events and the  
186 most dramatic habitat conversion events across time relative to when monitoring is mismatched  
187 with forest cover change (Figures 2-3). A greater proportion of the planet is projected to  
188 experience an unprecedented amount of land-use change in the coming decades<sup>45</sup>, highlighting

189 the importance of improved biodiversity monitoring in current and future hotspots of forest loss  
 190 and habitat conversion.

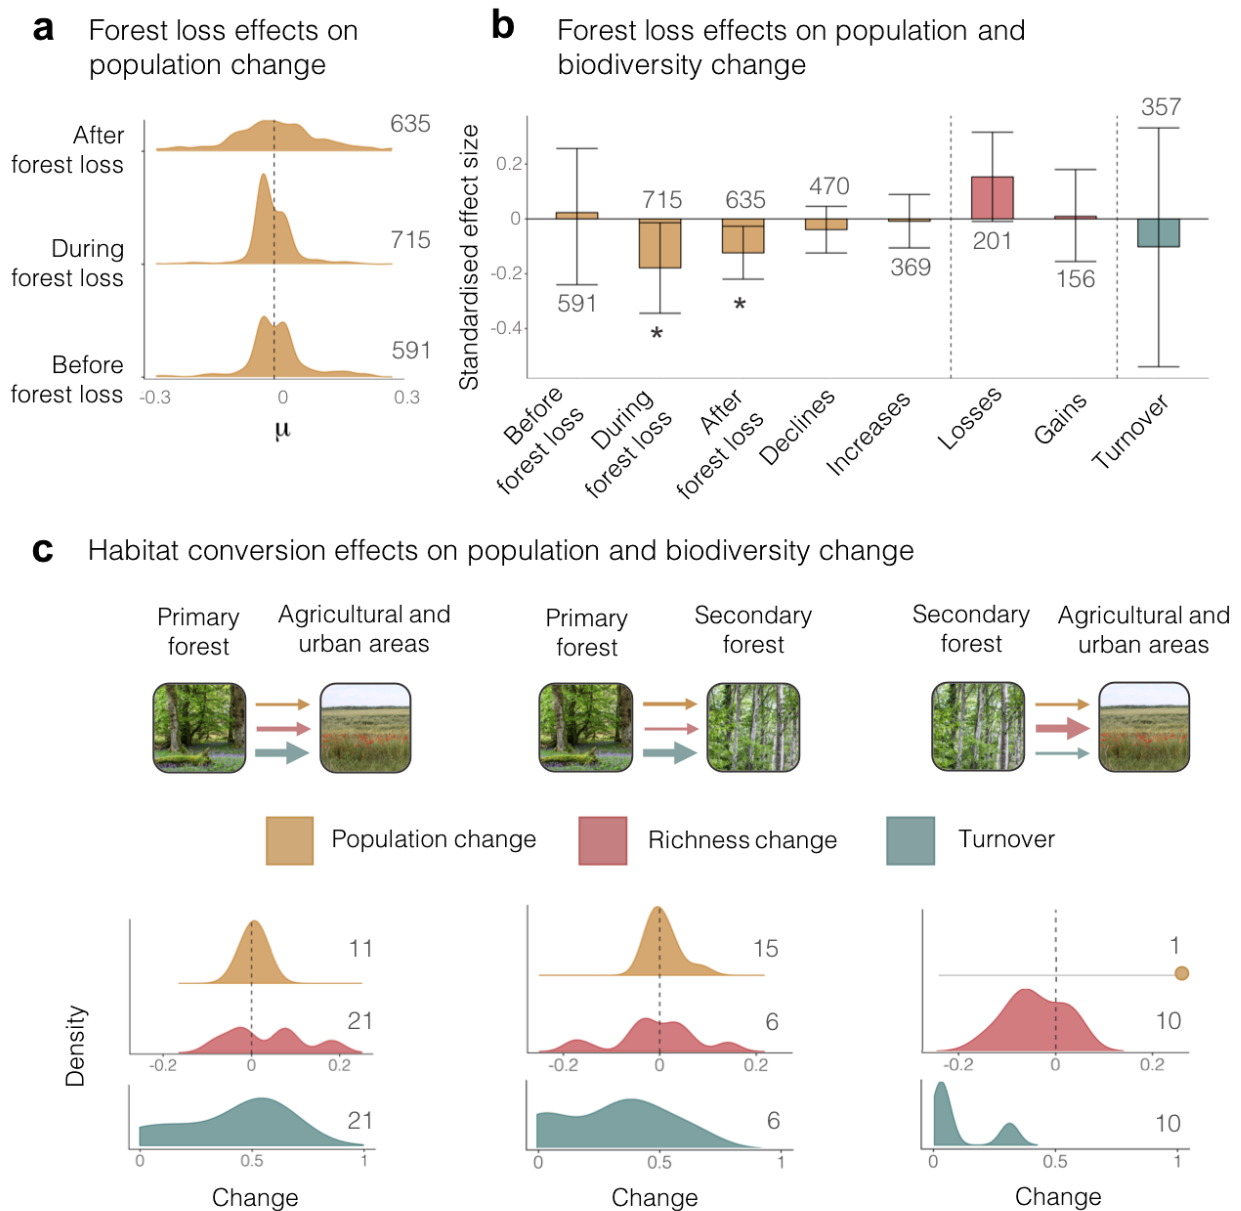

191

192 **Figure 3. Population declines were most acute when the all-time peak in deforestation**

193 **for study sites occurred within the duration of population monitoring. a, Population**

194 declines are more likely to be detected when peak deforestation occurs during the population

195 monitoring period (slope = -0.01, CI = -0.01 to -0.01). Density plots show distributions of  $\mu$  values

196 (population trend). **b**, Among time series, there were no directional relationships among overall  
197 forest loss and population declines and increases, species richness declines and turnover.  
198 Standardised effect sizes in **b** were calculated by dividing the slopes from hierarchical models  
199 testing population and biodiversity change as a function of forest loss by the standard deviation  
200 of forest loss. For visualisations of each model, see Extended Data Figures 5-6. Low sample  
201 size precluded an analysis of biodiversity change differences based on whether all-time peak  
202 forest loss had occurred before, during or after the biodiversity monitoring. Distributions in **c**  
203 show  $\mu$  values for population change, posterior means (slopes) for richness change and  
204 Jaccard's dissimilarity for turnover under different habitat conversions. Line thickness  
205 corresponds with magnitude of detected change. Forest loss led to habitat conversion in 304 of  
206 5795 (approximately 5%) of monitored population and biodiversity time series. There was only  
207 one instance of a population time series experiencing habitat conversion with secondary forest  
208 as the starting dominant land cover, thus no distribution is plotted for that category. The y-axis  
209 in **c** refers to the probability density function for the kernel density estimation per unit on the x-  
210 axis, and the distributions are relative to one another. Numbers in plots indicate number of time  
211 series for each category. Small sample sizes of an average 10 time series per transition types  
212 of interest for this analysis precluded statistical analysis and inferences on the effects of habitat  
213 transitions were drawn by visually inspecting the density distributions. See Extended Data  
214 Figures 5-6 and Extended Data Table 1 for models of forest cover gain and loss (GFC  
215 database<sup>12</sup>, 2000-2016) and forest cover loss (LUH database<sup>11</sup>, across the time series) and  
216 population and biodiversity change. See Extended Data Figure 7 for distributions of population  
217 and biodiversity change following habitat transitions detected by the MODIS Land Cover  
218 Database<sup>32</sup>.  
219

220 We found evidence for up to half-century ecological lags in changes in population abundance,  
221 species richness and community composition following forest loss (Figure 4). On average, we  
222 documented maximum change in populations and biodiversity six to 13 years after  
223 contemporary peak forest loss across taxa. Yet, nearly half of population and biodiversity  
224 change (40%) occurred within three years of peak forest loss, demonstrating that rapid shifts in  
225 populations and ecological communities occur frequently (Figure 4a). As predicted, the period  
226 between peak forest loss and peak change in populations and biodiversity was longer for taxa  
227 with longer generation times (e.g., large mammals, Figure 4b, Extended Data Table 1), further  
228 confirmed by a *post-hoc* analysis of lags in population change versus mammal generation time  
229 (Extended Data Figure 8a). Population declines and increases occurred on similar time scales  
230 (Extended Data Figure 8b-c), potentially explaining why previous temporal analyses of  
231 population change have not found evidence for net population declines<sup>1,20</sup>. Losses in species  
232 richness lagged behind richness gains only by approximately half a year (slope = 0.5, CI = 0.1  
233 – 1.05), indicating that potential extinction debts and immigration credits accumulated at roughly  
234 the same speed across taxa. The similar pace and temporal delay of richness gains and losses  
235 could be the source of the previously observed findings of no net local richness change<sup>3,4</sup>, yet  
236 substantial compositional change<sup>2,4</sup> across sites and taxa. Such temporal lags in biodiversity  
237 change have also been observed in post-agricultural forests<sup>2,46</sup> and fragmented grasslands<sup>40</sup>,  
238 where agricultural activity has ceased decades to centuries ago, yet richness and community  
239 composition change continue to the modern-day. Overall, our results indicate that increasing  
240 rates of land-use change in the Anthropocene<sup>11,45</sup> will alter ecosystems on both short- and long-  
241 term timescales.

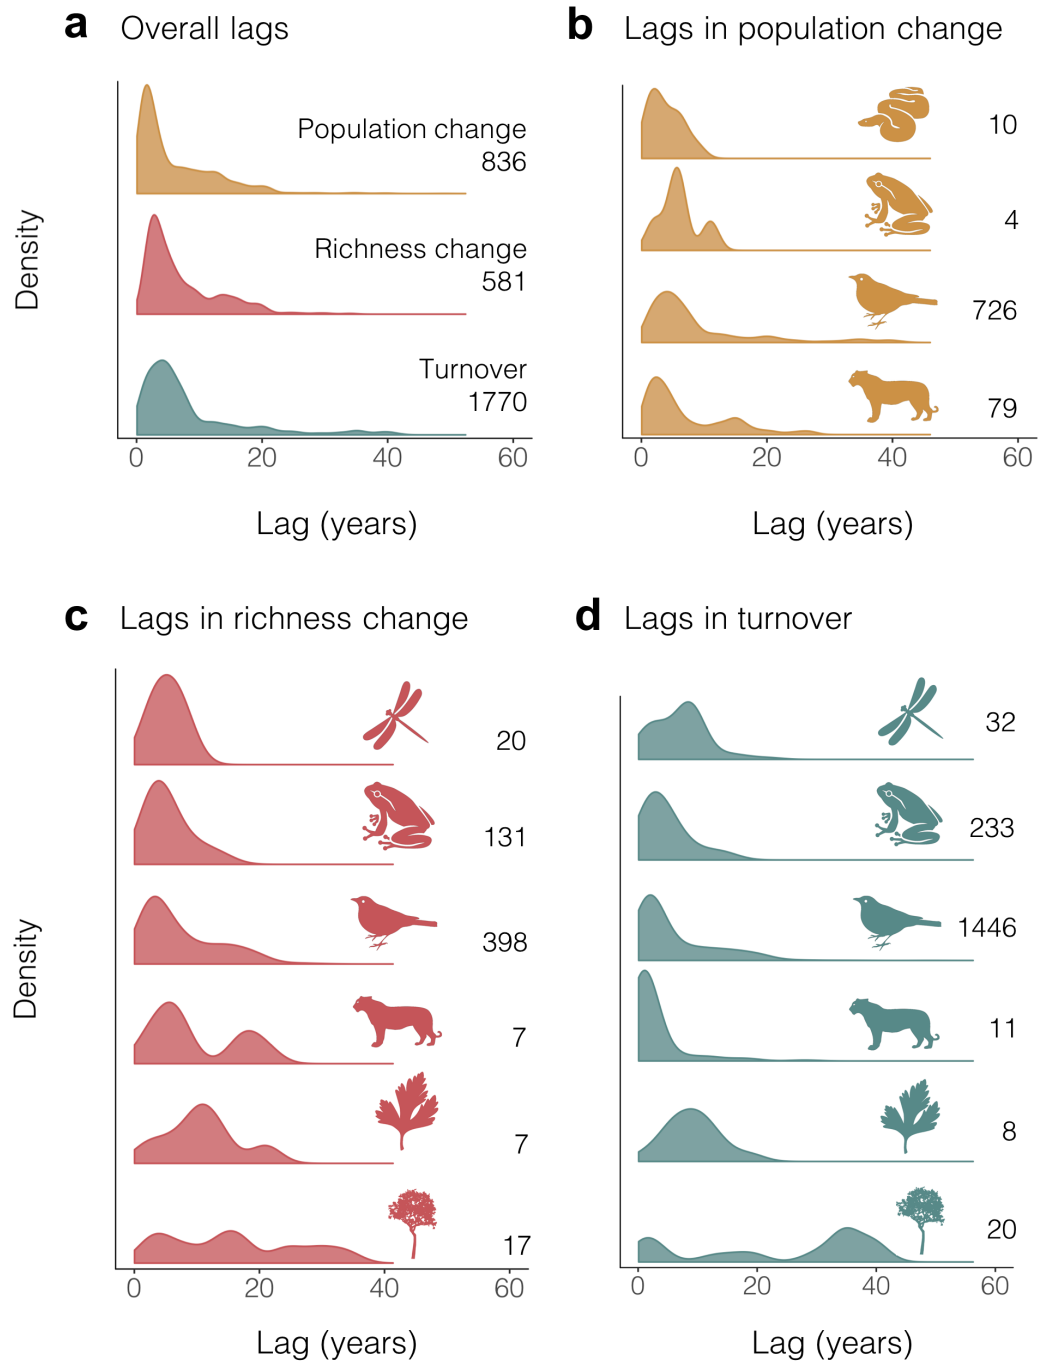

242

243 **Figure 4. Population and community change after peak forest loss may be delayed by up**

244 **to half a century across 3,187 time series from around the world, with species with long**

245 **generation times and low mobility showing the largest temporal lags. a, Distributions of**

246 temporal lag values (measured in years). **b**, Vertebrate population change lags by taxa (reptiles,  
247 amphibians, birds and mammals). **c**, Richness change and **d**, turnover lags by taxa  
248 (invertebrates, amphibians, birds, mammals, plants and trees). Peak forest loss refers to the  
249 timing of the largest forest loss event across the duration of each time series. Lag was measured  
250 as the number of years between peak forest loss and peak population/biodiversity change.  
251 Turnover was measured as Jaccard's dissimilarity, where zero indicates to changes in species  
252 composition and one indicates a completely new set of species. Numbers on plots indicate  
253 number of time series. Some time series did not experience richness change following peak  
254 forest loss, thus no lags were calculated for them. See Extended Data Table 1 for model outputs.

255

256 In summary, our analysis reveals an acceleration of increases and decreases of populations  
257 and biodiversity after forest loss and habitat conversion at sites around the planet. Our findings  
258 that all is not loss contrast with our hypothesis and challenge the widely-held assumption that  
259 land-use change universally leads to population declines and species richness loss<sup>8,15,23</sup>.  
260 Nevertheless, the increased magnitude and likelihood of population declines during and  
261 following peak forest loss highlight that human impacts are altering the biodiversity of the planet  
262 and emphasize the importance of expanded biodiversity monitoring in current and future  
263 hotspots of land-use change. A critical assumption underlying existing projections of biodiversity  
264 responses to land-use change<sup>8,23</sup> is that space-for-time approaches accurately reflect longer-  
265 term population and biodiversity dynamics<sup>11</sup>. On the contrary, we find that temporal lags in  
266 population and biodiversity change following forest loss varied by taxa and generation time and  
267 extended up to half of a century. Over the Anthropocene, ecosystems could be responding to a  
268 suite of global change drivers, in addition to land-use change, and a key next research step is  
269 to test the synergy and discord between the effects of multiple anthropogenic threats on Earth's  
270 biota. Our results highlight the complex biological responses to habitat conversion across sites,

271 taxa and time scales that are leading to the reorganisation of ecological communities. Thus,  
272 indicators used to assess biodiversity change regionally and globally<sup>10</sup>, including progress  
273 towards Aichi targets<sup>47</sup>, must capture the full spectrum and temporal spread of population and  
274 biodiversity responses to human impacts across the Anthropocene.



275 **References**

- 276 1. Daskalova, G. N., Myers-Smith, I. H. & Godlee, J. L. Rarity and conservation status do not  
277 predict vertebrate population trends. *bioRxiv* (2018). doi:<https://doi.org/10.1101/272898>
- 278 2. Baeten, L., Hermy, M., Van Daele, S. & Verheyen, K. Unexpected understory community  
279 development after 30 years in ancient and post-agricultural forests: Land use and 30-year  
280 forest development. *J. Ecol.* **98**, 1447–1453 (2010).
- 281 3. Vellend, M. *et al.* Global meta-analysis reveals no net change in local-scale plant  
282 biodiversity over time. *Proc. Natl. Acad. Sci.* **110**, 19456–19459 (2013).
- 283 4. Dornelas, M. *et al.* Assemblage Time Series Reveal Biodiversity Change but Not  
284 Systematic Loss. *Science* **344**, 296–299 (2014).
- 285 5. Magurran, A. E. *et al.* Divergent biodiversity change within ecosystems. *Proc. Natl. Acad.*  
286 *Sci.* **115**, 1843–1847 (2018).
- 287 6. Yoccoz, N. G., Ellingsen, K. E. & Tveraa, T. Biodiversity may wax or wane depending on  
288 metrics or taxa. *Proc. Natl. Acad. Sci.* **115**, 1681–1683 (2018).
- 289 7. Hillebrand, H. *et al.* Biodiversity change is uncoupled from species richness trends:  
290 Consequences for conservation and monitoring. *J. Appl. Ecol.* **55**, 169–184 (2018).
- 291 8. Newbold, T. *et al.* Global effects of land use on local terrestrial biodiversity. *Nature* **520**,  
292 45–50 (2015).
- 293 9. Maxwell, S. L., Fuller, R. A., Brooks, T. M. & Watson, J. E. Biodiversity: The ravages of  
294 guns, nets and bulldozers. *Nature* **536**, 143–145 (2016).
- 295 10. IPBES. Summary for policymakers of the regional assessment report on biodiversity and  
296 ecosystem services for Europe and Central Asia of the Intergovernmental Science-Policy  
297 Platform on Biodiversity and Ecosystem Services. M. Fischer, M. Rounsevell, A. Torre-  
298 Marin Rando, A. Mader, A. Church, M. Elbakidze, V. Elias, T. Hahn. P.A. Harrison, J.

- 299 Hauck, B. Martín-López, I. Ring, C. Sandström, I. Sousa Pinto, P. Visconti and N.E  
300 Zimmermann (eds.). IPBES secretariat, Bonn, Germany. (2018).
- 301 11. De Palma, A. *et al.* Challenges With Inferring How Land-Use Affects Terrestrial  
302 Biodiversity: Study Design, Time, Space and Synthesis. in *Advances in Ecological*  
303 *Research* **58**, 163–199 (Elsevier, 2018).
- 304 12. LPI. Living Planet Index database. (2016).
- 305 13. Dornelas, M. *et al.* BioTIME: A database of biodiversity time series for the Anthropocene.  
306 *Glob. Ecol. Biogeogr.* **27**, 760–786 (2018).
- 307 14. Blowes, S., Supp S. R. *et al.* Biodiversity trends are stronger in marine than terrestrial  
308 assemblages. (2018). doi:10.1101/457424
- 309 15. Ceballos, G., Ehrlich, P. R. & Dirzo, R. Biological annihilation via the ongoing sixth mass  
310 extinction signaled by vertebrate population losses and declines. *Proc. Natl. Acad. Sci.*  
311 201704949 (2017). doi:10.1073/pnas.1704949114
- 312 16. Bowler, D. E., Heldbjerg, H., Fox, A. D., O'Hara, R. B. & Böhning-Gaese, K. Disentangling  
313 the effects of multiple environmental drivers on population changes within communities. *J.*  
314 *Anim. Ecol.* **87**, 1034–1045 (2018).
- 315 17. Biesmeijer, J. C. Parallel Declines in Pollinators and Insect-Pollinated Plants in Britain and  
316 the Netherlands. *Science* **313**, 351–354 (2006).
- 317 18. Steinbauer, M. J. *et al.* Accelerated increase in plant species richness on mountain  
318 summits is linked to warming. *Nature* **556**, 231–234 (2018).
- 319 19. Elahi, R. *et al.* Recent Trends in Local-Scale Marine Biodiversity Reflect Community  
320 Structure and Human Impacts. *Curr. Biol.* **25**, 1938–1943 (2015).
- 321 20. Leung, B., Greenberg, D. A. & Green, D. M. Trends in mean growth and stability in  
322 temperate vertebrate populations. *Divers. Distrib.* **23**, 1372–1380 (2017).

- 323 21. Bowler, D. *et al.* The geography of the Anthropocene differs between the land and the  
324 sea. (2018). doi:10.1101/432880
- 325 22. Betts, M. G. *et al.* Global forest loss disproportionately erodes biodiversity in intact  
326 landscapes. *Nature* **547**, 441–444 (2017).
- 327 23. Newbold, T. Future effects of climate and land-use change on terrestrial vertebrate  
328 community diversity under different scenarios. *Proc. R. Soc. B Biol. Sci.* **285**, 20180792  
329 (2018).
- 330 24. Newbold, T., Tittensor, D. P., Harfoot, M. B. J., Scharlemann, J. P. W. & Purves, D. W.  
331 Non-linear changes in modelled terrestrial ecosystems subjected to perturbations. (2018).  
332 doi:10.1101/439059
- 333 25. Elmendorf, S. C. *et al.* Experiment, monitoring, and gradient methods used to infer climate  
334 change effects on plant communities yield consistent patterns. *Proc. Natl. Acad. Sci.* **112**,  
335 448–452 (2015).
- 336 26. Mihoub, J.-B. *et al.* Setting temporal baselines for biodiversity: the limits of available  
337 monitoring data for capturing the full impact of anthropogenic pressures. *Sci. Rep.* **7**,  
338 41591 (2017).
- 339 27. Gotelli, N. J. *et al.* Community-level regulation of temporal trends in biodiversity. *Sci. Adv.*  
340 **3**, e1700315 (2017).
- 341 28. Fahrig, L. Ecological Responses to Habitat Fragmentation Per Se. *Annu. Rev. Ecol. Evol.*  
342 *Syst.* **48**, 1–23 (2017).
- 343 29. Haddad, N. M. *et al.* Experimental evidence does not support the Habitat Amount  
344 Hypothesis. *Ecography* **40**, 48–55 (2017).
- 345 30. Hurtt, G. C. *et al.* Harmonization of land-use scenarios for the period 1500–2100: 600  
346 years of global gridded annual land-use transitions, wood harvest, and resulting  
347 secondary lands. *Clim. Change* **109**, 117–161 (2011).

- 348 31. Hansen, M. C. *et al.* High-resolution global maps of 21st-century forest cover change.  
349 *Science* **342**, 850–853 (2013).
- 350 32. Channan, S., Collins, K. & Emanuel, W. R. Global mosaics of the standard MODIS land  
351 cover type data. University of Maryland and the Pacific Northwest National Laboratory,  
352 College Park, Maryland, USA. (2014).
- 353 33. Olson, D. M. & Dinerstein, E. The Global 200: Priority Ecoregions for Global Conservation.  
354 *Ann. Mo. Bot. Gard.* **89**, 199 (2002).
- 355 34. Humbert, J.-Y., Scott Mills, L., Horne, J. S. & Dennis, B. A better way to estimate  
356 population trends. *Oikos* **118**, 1940–1946 (2009).
- 357 35. Baselga, A. Partitioning the turnover and nestedness components of beta diversity:  
358 Partitioning beta diversity. *Glob. Ecol. Biogeogr.* **19**, 134–143 (2010).
- 359 36. Sax, D. F. & Gaines, S. D. Species diversity: from global decreases to local increases.  
360 *Trends Ecol. Evol.* **18**, 561–566 (2003).
- 361 37. IUCN. The IUCN Red List of Threatened Species. Version 2017-3. (2017).
- 362 38. Benayas, J. M. R., Newton, A. C., Diaz, A. & Bullock, J. M. Enhancement of Biodiversity  
363 and Ecosystem Services by Ecological Restoration: A Meta-Analysis. *Science* **325**, 1121–  
364 1124 (2009).
- 365 39. Chazdon, R. L. Beyond Deforestation: Restoring Forests and Ecosystem Services on  
366 Degraded Lands. *Science* **320**, 1458–1460 (2008).
- 367 40. Krauss, J. *et al.* Habitat fragmentation causes immediate and time-delayed biodiversity  
368 loss at different trophic levels: Immediate and time-delayed biodiversity loss. *Ecol. Lett.*  
369 **13**, 597–605 (2010).
- 370 41. Bommarco, R. *et al.* Dispersal capacity and diet breadth modify the response of wild bees  
371 to habitat loss. *Proc. R. Soc. B Biol. Sci.* **277**, 2075–2082 (2010).

- 372 42. Spooner, F. E. B., Pearson, R. G. & Freeman, R. Rapid warming is associated with  
373 population decline among terrestrial birds and mammals globally. *Glob. Change Biol.* **24**,  
374 4521–4531 (2018).
- 375 43. Kaplan, J. O., Krumhardt, K. M. & Zimmermann, N. The prehistoric and preindustrial  
376 deforestation of Europe. *Quat. Sci. Rev.* **28**, 3016–3034 (2009).
- 377 44. Olden, J. D., LeRoy Poff, N., Douglas, M. R., Douglas, M. E. & Fausch, K. D. Ecological  
378 and evolutionary consequences of biotic homogenization. *Trends Ecol. Evol.* **19**, 18–24  
379 (2004).
- 380 45. Egli, L., Meyer, C., Scherber, C., Kreft, H. & Tschardt, T. Winners and losers of national  
381 and global efforts to reconcile agricultural intensification and biodiversity conservation.  
382 *Glob. Change Biol.* (2018). doi:10.1111/gcb.14076
- 383 46. Vellend, M. *et al.* Extinction debt of forest plants persists for more than a century following  
384 habitat fragmentation. *Ecology* **87**, 542–548 (2006).
- 385 47. CBD. Strategic plan for biodiversity 2011–2020 and the Aichi targets. In Report of the  
386 Tenth Meeting of the Conference of the Parties to the Convention on Biological Diversity.  
387 (2010).

388

### 389 **Acknowledgements**

390 We thank the WWF and ZSL for compiling the Living Planet Database, the BioTime team for  
391 compiling the BioTime database (which was supported by ERC AdG BioTIME 250189 and  
392 ERC PoC BioCHANGE 727440), the creators of the Land Use Harmonization Database, The  
393 Hansen Lab for producing the Forest Cover Change Database and NASA for producing the  
394 MODIS Landcover Database. We thank the Forest & Nature Lab at Ghent University for a  
395 stimulating discussion on historic and contemporary land-use change and choosing appropriate  
396 baselines for comparison of biodiversity change through time. We are grateful to Albert

397 Phillimore and Kyle Dexter for providing advice during the conceptualization of the study, and  
398 to Laura Antão and Mark Vellend for providing feedback on the draft manuscript. We thank the  
399 German Centre for Integrative Biodiversity Research (iDiv) Halle-Jena-Leipzig and the sChange  
400 working group for supporting the initial data synthesis work that has led to this study. G.N.D.  
401 was funded by a Carnegie-Caledonian PhD Scholarship and supported by a NERC doctoral  
402 training partnership grant (NE/L002558/1).

403

#### 404 **Author contributions**

405 G.N.D., M.A.D. and I.M.S. conceptualised the study. G.N.D. integrated databases and  
406 conducted statistical analyses with input from S.B., I.M.S., A.D.B. and M.A.D. G.N.D. created  
407 the figures with input from co-authors. S.B. and S.S. wrote the code for the rarefaction of the  
408 BioTIME studies. I.M.S. was the primary supervisor and M.A.D. the co-supervisor for G.N.D.  
409 M.A.D. and A.M. funded the compilation of the BioTime database. G.N.D. wrote the first draft  
410 and all authors contributed to revisions.

411

#### 412 **Methods**

413 For an illustration of the workflow of our analyses of forest cover and population and biodiversity  
414 change through time, see Extended Data Figures 1 and 3b. All data and statistical analyses are  
415 described in detail below. We did not predetermine sample size and instead worked with all  
416 available temporal population, biodiversity and forest cover change data that met our duration  
417 criteria. For analyses of population change, we included time series with five or more survey  
418 points. For analyses of biodiversity change, we included time series with five or more data points  
419 when analysing the full time series, and time series with two or more data points when matching  
420 the duration of time series comparisons to the 16-year duration of the Global Forest Change  
421 Database from 2000 to 2016).

422

## 423 **Databases**

### 424 *Forest cover change data*

425 To quantify historic and contemporary forest cover change, we extracted historic forest loss  
426 from the Land Use Harmonisation (LUH; 850 – 2015, forest loss and habitat transitions at a  
427 0.25° degree resolution)<sup>30</sup> and contemporary forest cover change and habitat conversions from  
428 the Global Forest Change (GFC, 2000 – 2016, forest loss and gain at a 30 m resolution)<sup>31</sup>, and  
429 MODIS Landcover (2000 – 2013, land-use transitions at 500m resolution)<sup>32</sup> datasets.

430

### 431 *Land Use Harmonisation Database*

432 To estimate forest cover change across a time period matching the full duration of the  
433 biodiversity observations, we derived the change in primary forest cover from the Land Use  
434 Harmonisation database (LUH)<sup>30</sup> for 96 km<sup>2</sup> cells around the location of each population in the  
435 LPD database and for the standardised grid cells of the BioTIME database (~ 96 km<sup>2</sup> each).  
436 LUH includes annual gridded fractions of land-use states for the period from 850 to 2013 at  
437 0.25° x 0.25° resolution. The estimates are based on historical reconstructions using Earth  
438 System models, with inputs such as regional and national rates of wood harvest and potential  
439 biomass density. The accuracy and precision of LUH increases towards the modern day, when  
440 there are more available data to inform the Earth System models. Note that unlike GFC, LUH  
441 estimates forest cover as a proportion (bounded between zero and one). For our analyses, we  
442 focused on time series from locations that have experienced at least 0.05 (equivalent to 5%)  
443 forest loss. To calculate total forest cover change over the period of a given population or  
444 biodiversity time series, we subtracted the proportion of forest cover in the first year of  
445 biodiversity monitoring from the proportion of forest cover in the last year. The type of forest  
446 cover change detected by the LUH database was predominantly forest loss, with forest gain

447 occurring infrequently and at very small magnitudes (<0.001 out of maximum 1), thus we focus  
448 our analysis on forest loss.

449

450 To estimate the historic baseline of forest cover change, we calculated yearly change in % forest  
451 cover in a study cell from one year to the next for each site from 850 to 2015 from the LUH data,  
452 and determined the 10-year period when the most forest loss occurred (historic peak forest loss,  
453 calculated by adding the yearly proportions of forest loss in each cell over standardised 10-year  
454 blocks). Time since historic peak forest loss was a poor predictor of the variation in  
455 contemporary population and biodiversity change (Extended Data Figure 10e-f). To determine  
456 contemporary peak forest loss for each time series of monitoring data, we calculated yearly  
457 changes in forest cover across the duration of each time series and determined the year when  
458 the most change had occurred.

459

#### 460 *Global Forest Change Database*

461 We derived overall forest loss and forest gain across the 2000-2016 period for 96 km<sup>2</sup> cells  
462 around the location of each population in the LPD database and for the standardised grid cells  
463 of the BioTIME database (~ 96 km<sup>2</sup> each) from the Global Forest Change (GFC)<sup>31</sup> database  
464 using the Google Earth Engine<sup>48</sup>. The GFC database provides high resolution forest cover  
465 change data, derived from Landsat satellite observations at a 30-meter spatial resolution. We  
466 calculated the total area of forest cover gain and loss separately (measured in km<sup>2</sup>) for each 96  
467 km<sup>2</sup> cell on a yearly time step. We then summed the yearly values for the period that coincided  
468 with population and biodiversity monitoring to estimate overall forest cover gain and loss (two  
469 separate metrics). For example, for a biodiversity time series spanning 2002 – 2009, our forest  
470 cover gain and loss metrics included the total amount of forest cover gained and lost during that  
471 same period. For our analyses, we focused on time series from locations that have experienced



472 at least 0.5 km<sup>2</sup> of forest gain or loss. GFC does not distinguish between primary forest,  
473 secondary forest and plantations, but it does provide a very high-resolution measure of general  
474 forest cover. The drivers of the forest loss detected by GFC across our study sites are  
475 predominantly forestry, changes in agricultural practices and wildfires<sup>49</sup>. Note that the GFC  
476 database spans from 2000 to 2016, whereas the earliest terrestrial biodiversity record in  
477 BioTIME is from 1858.

478

#### 479 *MODIS Landcover Database*

480 We used the MODIS Landcover Database<sup>32</sup> to quantify habitat conversion for locations where  
481 we had population and biodiversity monitoring data. The MODIS Database has a resolution of  
482 500 m, and it uses satellite-derived reflectance data to classify land cover around the world. To  
483 determine the types of habitat conversion between 2000 and 2013 (the time span of available  
484 MODIS data) across all monitoring locations, we calculated the dominant land cover type at the  
485 start and end of each population and biodiversity time series and split time series into categories  
486 such as “no habitat conversion” and “grassland to woody savannah”. We focused on the eight  
487 most frequent types of habitat conversion (Extended Data Figure 7).

488

489 By synthesising information from scenario data based on Earth Dynamics Models (LUH) and  
490 remote-sensing databases (GFC, MODIS), we were able to determine historic forest loss from  
491 the start of the monitoring period to 2015, as well as contemporary forest cover change (gain  
492 and loss) and habitat transitions from 2000 to 2016. GFC and MODIS detect forest cover, with  
493 no distinction between primary and secondary forests, thus we derived information on  
494 transitions from primary to secondary forest from the LUH database. We calculated overall  
495 forest cover change because we considered total change in habitat to be more meaningful for  
496 long-term population and biodiversity trends as opposed to an annual rate of forest cover

497 change which does not capture cumulative effects. Together, the three databases (GFC,  
498 MODIS, LUH) encompass two different elements of land-use change: 1) land cover types and  
499 long-term historical reconstructions of past land-use and habitat conversions and 2) high-  
500 resolution satellite data from recent years of forest cover change and habitat conversion types.  
501 Thus, the combined analysis allows for a comprehensive test of the effects of land-use change  
502 on populations and biodiversity around the world.

503

504 *Population time series data (Living Planet Database)*

505 We analysed 4,228 population time series, with records distributed around the world.  
506 Geographic representation is variable with, for example, an under-representation of tropical  
507 regions in the population data (Figure 1). In the LPD, some populations have precise  
508 coordinates, whereas the location of others are approximate. Because of the extent over which  
509 we are calculating forest cover change (96 km<sup>2</sup>), we included both types of populations in our  
510 analysis. Duration varied across time series (Extended Data Figure 4c-d) and we only included  
511 populations with at least five survey points. The overall range of the time series covered the  
512 period between the years 1970 and 2014. We calculated population change using state-space  
513 models which are particularly appropriate when quantifying change in data with varying  
514 collection methodology, as they take into account observation error and process noise<sup>50,51</sup>. For  
515 more details on state-space model calculations, see Humbert *et al.* 2009<sup>34</sup> and Daskalova *et al.*  
516 2018<sup>1</sup>. We scaled the population size data to be between 0 and 1 to analyse within-population  
517 relationships and to make sure that we were not conflating within-population relationships and  
518 between-population relationships<sup>52</sup>. State-space models partition the variance in abundance  
519 estimates into process error ( $\sigma^2$ ) and observation or measurement error ( $\tau^2$ ) and estimate  
520 population trends ( $\mu$ ):

521

$$X_t = X_{t-1} + \mu + \varepsilon_t, (1)$$

522 where  $X_t$  and  $X_{t-1}$  are the scaled (observed) abundance estimates (between 0 and 1) in the  
523 present and past year, with process noise represented by  $\varepsilon_t \sim \text{gaussian}(0, \sigma^2)$ . We included  
524 measurement error following:

$$525 \quad Y_t = X_t + F_t,$$

526 where  $Y_t$  is the estimate of the true (unobserved) population abundance with measurement  
527 error:

$$528 \quad F_t \sim \text{gaussian}(0, \tau^2).$$

529 We substituted the estimate of population abundance ( $Y_t$ ) into equation 1:

$$530 \quad Y_t = X_{t-1} + \mu + \varepsilon_t + F_t.$$

531 Given  $X_{t-1} = Y_{t-1} - F_{t-1}$ , then:

$$532 \quad Y_t = Y_{t-1} + \mu + \varepsilon_t + F_t - F_{t-1}.$$

533

534 For each time series, we calculated overall population change ( $\mu$ ) experienced 1) across the  
535 periods before and after contemporary peak forest loss, 2) across the full duration of the time  
536 series, 3) from 2000 to 2016 (matching the temporal scale of the GFC database), and 4) from  
537 2000 to 2013 (matching the temporal scale of the MODIS database). We standardised the  
538 number of years over which we calculated population change before and after peak forest loss  
539 on the population-level, meaning that the number of years before and after was the same within  
540 populations, but might differ among populations.

541

542 *Biodiversity time series data (BioTIME Database)*

543 We analysed 2,339 time series from 190 studies from terrestrial biomes across the globe, part  
544 of the BioTIME database<sup>13</sup> (with the addition of 36 studies that are not yet a part of the public  
545 database). Similarly to the LPD, tropical regions and some taxa such as amphibians and reptiles

546 were under-represented. Some of the study locations fall within protected areas (32%). Because  
547 those studies only had one time series each, overall only 1% of analysed time series were from  
548 inside protected areas. To account for the different spatial extents of the BioTIME database and  
549 uneven sampling, studies with multiple locations and extents > 72 km<sup>2</sup> were partitioned into 96  
550 km<sup>2</sup> grids, and then sample-based rarefaction was applied to standardise sampling within each  
551 time series<sup>14</sup>. Duration varied across time series (Extended Data Figure 4c-d) and the overall  
552 range of the time series covered the period between the years 1858 and 2016. For time series  
553 with five or more years of monitoring records, we calculated overall richness change and  
554 turnover experienced 1) across the periods before and after contemporary peak forest loss, 2)  
555 across the full duration of the time series. For time series with two or more years of monitoring  
556 records, we calculated overall richness change and turnover experienced 3) from 2000 to 2016  
557 (matching the temporal scale of the GFC database), and 4) from 2000 to 2013 (matching the  
558 temporal scale of the MODIS database). The GFC and MODIS databases cover shorter time  
559 periods, thus we included biodiversity time series with shorter durations than the five-year cut  
560 off point that was used in the rest of our analyses using datasets with longer durations (but note  
561 that 76% of biodiversity time series had a duration of three or more years). To estimate richness  
562 change, we modelled species richness versus time (year, mean centered) with random slopes  
563 and intercepts for each rarefied cell and a Poisson error distribution with a log link.

$$564 \quad \log(\mu_{j,i,t}) = \beta_0 + \beta_{0j} + \beta_{0j,i} + (\beta_1 + \beta_{1j} + \beta_{1j,i})year_{j,i,t},$$

$$565 \quad y_{j,i,t} \sim \text{poisson}(\mu_{j,i,t}),$$

566 where  $year_{j,i,t}$  is the time in years,  $\beta_0$  and  $\beta_1$  are the global intercept and slope (fixed effects),  
567  $\beta_{0j}$  and  $\beta_{1j}$  are the biome-level departures from  $\beta_0$  and  $\beta_1$  (respectively; biome-level random  
568 effects),  $\beta_{0j,i}$  and  $\beta_{1j,i}$  are the (nested) cell-level departures from  $\beta_0$  and  $\beta_1$  (cell-level random  
569 effects);  $y_{j,i,t}$  is the (rarefied) species richness within the  $j$ th biome in the  $i$ th cell in year  $t$ .

570

571 From the richness over time model, we extracted the posterior means for richness change for  
572 each time series (i.e., the cell-level slope estimates), which then became the response variable  
573 in the second stage of our analyses where we tested richness change versus forest cover  
574 change (see Statistical analyses section).

575

576 To determine changes in community composition, we calculated the turnover component of  
577 beta diversity (changes due to species replacement rather than changes in species  
578 abundances<sup>14,35</sup>), at the end of each time period outlined above relative to the first year of  
579 observation in the same period. Turnover is bound between zero and one, where zero is no  
580 change in species composition and one indicates that all of the original species of a community  
581 have been replaced with new species.

582

### 583 **Statistical analyses**

584 When testing for an attribution signal (i.e., evidence that a predictor variable is a potential driver  
585 of population or biodiversity change), we always matched the temporal scales of the forest cover  
586 change data and the population and biodiversity data. For example, when testing the effects of  
587 forest cover change and land-use transitions as detected by GFC (2000 – 2016) and MODIS  
588 (2000 – 2013), we calculated population and biodiversity change for the same time periods.  
589 Because of the longer duration of the LUH database, we were also able to extract forest and  
590 land cover information for the full duration of the LPD and BioTIME time series. For our analyses  
591 of contemporary peak forest loss and overall forest loss (using the LUH database over a time  
592 period matching the duration of each time series), we excluded locations which had less than  
593 0.05 (out of maximum 1) forest cover change. We excluded locations which had no forest cover  
594 across the duration of the time series in both the 96 km<sup>2</sup> cells and the 500 km<sup>2</sup> larger landscape

595 cells from our analyses of population and biodiversity change versus forest cover gain and loss  
596 from 2000 to 2016 (using the GFC database). See Extended Data Table 1 for the outputs of all  
597 statistical models and their respective sample sizes.

598

599 *Population and biodiversity change after versus before contemporary peak forest loss*

600 To test if temporal population and biodiversity change differed before and after peak forest loss  
601 on the site-level, we split each time series into two periods – before and after peak deforestation  
602 – and estimated population change, richness change and turnover for each period separately.  
603 Then, to infer if population and biodiversity change differed following peak forest loss, we  
604 modelled  $\mu$  (population change), richness change (cell-level random slopes) and turnover as a  
605 function of period (categorical with two levels – before or after forest loss) and time series  
606 duration (numeric) as fixed effects, with a biome random effect to account for the spatial  
607 clustering of the data. For population and richness change, we modelled the positive and  
608 negative components of the distributions of change separately, e.g., one model for populations  
609 with positive  $\mu$  values and one model for populations with negative  $\mu$  values. This approach  
610 allowed us to test if the effects of forest loss differ across the positive and negative dimensions  
611 of population and biodiversity change. The models were as follows:

612 
$$\mu_{j,i,p} = \beta_0 + \beta_{0j} + \beta_1 * duration_{j,i,p} + \beta_2 * period_{j,i,p},$$

613 
$$y_{j,i,p} \sim gaussian(\mu_{j,i,p}, \sigma^2),$$

614 where  $duration_{j,i,p}$  is the duration of the time series in years of cell  $i$  within biome  $j$  for period  $p$ ,  
615 and  $period_{j,i,p}$  is an indicator variable for the period (before or after forest loss);  $\beta_0$ ,  $\beta_1$  and  $\beta_2$   
616 are the global intercept and slope estimates for duration and the categorical period effect,  
617 respectively (fixed effects),  $\beta_{0j}$  is the biome-level departures from  $\beta_0$  (biome-level random

618 effects);  $y_{j,i,p}$  is the estimate for change in population size or species richness for the  $i$ th cell in  
619 the  $j$ th biome for the  $p$ th period.

620

621 To model the change in turnover before and after contemporary peak forest loss, we followed  
622 the same conceptual framework as outlined above, but we used a zero one inflated beta  
623 distribution to account for the properties of turnover (bounded between zero and one, inclusive,  
624 where one is a complete change in species composition). The probability density function for  
625 the zero one inflated beta distribution is:

$$626 \quad \text{betainf}(y; \alpha, \gamma, \mu, \phi) = \begin{cases} \alpha(1 - \gamma), & y = 0 \\ \alpha\gamma, & y = 1 \\ (1 - \alpha)\gamma f(y; \mu, \phi), & 0 < y < 1, \end{cases}$$

627 where  $\alpha$  is the probability that a zero or one occurs,  $\gamma$  is the probability that a one occurs (given  
628 an observation is a zero or a one), and  $\mu$  and  $\phi$  are the mean and precision of the beta  
629 distribution, respectively. In the parameterisation approach we used<sup>53</sup>  $\phi$  is inversely related to  
630 the variance. Beta parameterisation is also sometimes expressed through the parameters  $p$  and  
631  $q$  that can be derived from our framework following  $\phi = p + q$ <sup>54</sup>. Because only 7% of time series  
632 did not experience any change in species composition ( $y = 0$ ) in the time period after  
633 contemporary forest loss, and less than 1% of time series had a completely new set of species  
634 ( $y = 1$ ) occupying the ecological communities, for  $y = 0$  and  $y = 1$ ,  $\alpha$  and  $\gamma$  were modelled  
635 assuming a Bernoulli distribution and logit-link function, and models were fit with only an  
636 intercept. For  $0 < y < 1$ , we assumed a beta error distribution and a logit-link function:

$$637 \quad \text{logit}(\mu_{j,i,p}) = \beta_0 + \beta_{0j} + \beta_1 * \text{duration}_{j,i,p} + \beta_2 * \text{period}_{j,i,p},$$

$$638 \quad y_{j,i,p} \sim \text{Beta}(\mu_{j,i,p}, \phi),$$

639 where  $\text{duration}_{j,i,p}$  is the duration of the time series in years of cell  $i$  within biome  $j$  for period  $p$ ,  
640 and  $\text{period}_{j,i,p}$  is an indicator variable for the period (before or after forest loss);  $\beta_0$ ,  $\beta_1$  and  $\beta_2$

641 are the global intercept and slope estimates for duration and the categorical period variable  
642 respectively (fixed effects), and  $\beta_{0j}$  are the biome-level departures from  $\beta_0$  (biome-level random  
643 intercepts);  $y_{j,i,p}$  is the estimate of turnover for the  $i$ th cell in the  $j$ th biome for the  $p$ th period.

644

645 *Population change before, after and during the period of all-time historic peak forest loss*

646 To determine if population change differed based on whether population time series were  
647 recorded before, during, or after the period of all-time historic peak forest loss (the timing of the  
648 largest forest loss event at the location of each time series between the years 850 and 2015),  
649 we modelled  $\mu$  (population change) as a function of when monitoring started (categorical with  
650 three levels – before, during or after peak forest loss) and time series duration (numeric) as  
651 fixed effects, with a biome random effect to account for the spatial clustering of the data. Low  
652 sample size precluded a similar analysis for biodiversity change (Extended Data Figure 3). The  
653 model was as follows:

$$654 \quad \mu_{j,i,m} = \beta_0 + \beta_{0j} + \beta_1 * duration_{j,i,m} + \beta_2 * monitoring\ start_{j,i,m}$$

$$655 \quad y_{j,i,m} \sim gaussian(\mu_{j,i,m}, \sigma^2),$$

656 where  $duration_{j,i,m}$  is the duration of the time series in years of cell  $i$  within biome  $j$  for monitoring  
657 start  $m$ , and  $monitoring\ start_{j,i,m}$  is an indicator variable denoting when monitoring started;  $\beta_0$ ,  
658  $\beta_1$  and  $\beta_2$  are the global intercept and slope estimates for duration and the categorical  
659 monitoring start variable respectively (fixed effects),  $\beta_{0j}$  is the biome-level departures from  $\beta_0$   
660 (respectively; biome-level random effects);  $y_{j,i,m}$  is the estimate for change in population size or  
661 species richness for the  $i$ th cell in the  $j$ th biome for the  $m$ th monitoring start.

662

663 *Habitat conversion and population and biodiversity change*



664 To determine the influence of the type of forest cover change (i.e., land-use transitions) on  
665 population and biodiversity change, we compared the distributions of population and biodiversity  
666 change across transitions types (from primary forest to secondary forest, from primary forest to  
667 non-natural habitat, and from secondary forest to non-natural habitat, to which we refer as  
668 habitat conversion). Small sample sizes (on average 10 time series per transition type)  
669 precluded statistical analysis, thus we report findings from a visual inspection of distributions of  
670 population and biodiversity change across habitat conversion types.

671

672 To test the effect of forest cover change on population and biodiversity change among sites, we  
673 modelled population and biodiversity change versus overall forest cover change (calculated as  
674 forest cover gain and forest cover loss (GFC database, 2000-2016) and forest loss (LUH  
675 database, across the duration of the time series). Models of population and richness change  
676 versus forest cover change were fitted assuming Gaussian error.

$$677 \quad \mu_{j,i} = \beta_0 + \beta_{0j} + \beta_1 * duration_{j,i} + \beta_2 * forest\ change_{j,i},$$

$$678 \quad y_{j,i} \sim gaussian(\mu_{j,i}, \sigma^2),$$

679 where  $duration_{j,i}$  is the duration of the time series in years of cell  $i$  within biome  $j$ ,  $forest\ change_{j,i}$   
680 is the forest cover change in cell  $i$  within biome  $j$ ,  $\beta_0$ ,  $\beta_1$  and  $\beta_2$  are the global intercept and slope  
681 estimates for duration and forest cover change respectively (fixed effects), and  $\beta_{0j}$  are the  
682 biome-level departures from  $\beta_0$  (biome-level random intercepts);  $y_{j,i}$  is the population or  
683 richness change metric (a separate model for population declines, population increases,  
684 richness losses and richness gains) in the  $i$ th cell within the  $j$ th biome.

685

686 Models of turnover versus forest cover change were fit with a zero one inflated beta distribution  
687 to account for the properties of turnover (bounded between zero and one). We used the same

688 probability density function for the zero one inflated beta distribution as in the model for turnover  
689 before and after contemporary peak forest loss. For  $y = 0$  and  $y = 1$ ,  $\alpha$  and  $\gamma$  were modelled  
690 assuming a Bernoulli distribution and logit-link function, and we fit models with only an intercept.  
691 For  $0 < y < 1$ , we assumed a beta error distribution and a logit-link function:

$$\begin{aligned} \text{logit}(\mu_{j,i}) &= \beta_0 + \beta_{0j} + \beta_1 * \text{duration}_{j,i} + \beta_2 * \text{forest change}_{j,i}, \\ y_{j,i} &\sim \text{Beta}(\mu_{j,i}, \phi), \end{aligned}$$

694 where  $\text{duration}_{j,i}$  is the duration of the time series in years of cell  $i$  within biome  $j$ ,  $\text{forest change}_{j,i}$   
695 is the forest cover change in cell  $i$  within biome  $j$ ,  $\beta_0$ ,  $\beta_1$  and  $\beta_2$  are the global intercept and slope  
696 estimates for duration and forest cover change respectively (fixed effects), and  $\beta_{0j}$  are the  
697 biome-level departures from  $\beta_0$  (biome-level random intercepts);  $y_{j,i}$  is turnover in the  $i$ th cell  
698 within the  $j$ th biome.

699

#### 700 *Lags in population and biodiversity responses to contemporary peak forest loss*

701 To test for temporal lags in population and biodiversity responses to contemporary peak forest  
702 loss, we first calculated when population and biodiversity change were greatest following peak  
703 forest loss for each time series. Rates of population change were calculated using state-space  
704 models and a Kalman filter<sup>20,34</sup>. Peak richness change and peak turnover were calculated as  
705 the maximum value of the absolute differences between consecutive observations of species  
706 richness and turnover. We then quantified lag as the number of years between contemporary  
707 peak forest loss and peak population/biodiversity change. We modelled lag as a function of  
708 taxa, as we expect that species with longer generation times will respond to disturbance more  
709 slowly.

$$\begin{aligned} \mu_{j,i} &= \beta_0 + \beta_1 * \text{taxa}_{j,i}, \\ y_{j,i} &\sim \text{gaussian}(\mu_{j,i}, \sigma^2), \end{aligned}$$

711

712 where  $taxa_{j,i}$  is the taxa of the cell  $i$  in the biome  $j$  time series,  $\beta_1$  is the slope for taxa effect  
713 (fixed effect), and  $\beta_{0j}$  are the biome-level random intercepts;  $y_{j,i}$  is the temporal lag in the  
714 population or biodiversity change metric (a separate model for population change, richness  
715 change and turnover) for the  $i$ th cell within the  $j$ th biome.

716

717 We conducted a *post-hoc* analysis where we tested our temporal lag and generation time  
718 hypothesis in a more quantitative manner by modelling lag as a function of generation time in  
719 mammals, the taxa for which generation time data were freely available<sup>55</sup>.

720 
$$\mu_g = \beta_0 + \beta_1 * generation\ time_g,$$

721 
$$y_g \sim gaussian(\mu_g, \sigma^2),$$

722 where  $generation\ time_g$  is the mammal generation time in years,  $\beta_0$  and  $\beta_1$  are the global  
723 intercept and slope (fixed effect);  $y_g$  is the temporal lag in population change for a species with  
724 generation time  $g$ .

725

#### 726 *Prior specification*

727 For all models except the model of turnover versus overall forest cover change (which was a  
728 zero one inflated model), we used weakly regularising normally-distributed priors for the global  
729 intercept and slope:

730 
$$\beta_0 \sim gaussian(0, 6),$$

731 
$$\beta_1 \sim gaussian(0, 6).$$

732 For the turnover models that had a zero one inflated beta distribution, we used the following  
733 priors:

734 
$$\beta_0 \sim gaussian(0, 6),$$

735 
$$\beta_1 \sim gaussian(0, 6),$$

736  $zoi \sim \text{gaussian}(0, 0.5),$

737  $coi \sim \text{gaussian}(0, 0.5),$

738 where  $zoi$  is the probability of being a zero or a one and  $coi$  is the conditional probability of being  
739 a one (given an observation is a zero or a one).

740

741 Group-level parameters (the rarefied cell random effect in the species richness over time model,  
742  $i$ , and the biome random effect in all models,  $j$ ) were all assumed to be  $\text{gaussian}(0, \sigma)$ , and priors  
743 on the  $\sigma$  were the same for all models:

744  $\sigma\beta_{0j} = \sigma\beta_{0j,i} \sim \text{half Cauchy}(0, 2).$

745 All models were fitted in a Bayesian framework using the *brms* package v2.1.0<sup>53</sup> in R v3.5.1<sup>56</sup>.

746 Models were run for 6000 iterations, with a warm up of 2000 iterations. Convergence was  
747 assessed visually by examining trace plots and using *Rhat* values (the ratio of the effective  
748 sample size to the overall number of iterations, with values close to one indicating convergence).

749

#### 750 *Sensitivity analyses*

751 Our analyses were not sensitive to our calculation of turnover in the final year of the time series  
752 relative to the first year, and previous examinations of the BioTIME database have found that  
753 calculating turnover relative to the second year of observation produced similar results<sup>4</sup>. We  
754 also quantified population change using the BioTIME database (following the same state-space  
755 modelling framework as with the LPD) and found similar lack of directional patterns in the  
756 relationships between population change and overall forest loss (Extended Data Figure 5f). We  
757 found no distinct geographic or taxonomic patterning in the relationships between population  
758 change, biodiversity change and forest cover change (Extended Data Figure 9). Furthermore,  
759 the relationships between population decreases and increases and forest loss were not  
760 influenced by whether species were tightly associated with forests or not (Extended Data Figure

761 5g-i). Similar *post-hoc* analysis was not possible for the biodiversity time series because habitat  
762 preference data were not available for many of the species included in the BioTIME database.  
763 The cell size over which we calculated forest cover change (from 10 km<sup>2</sup> to 500 km<sup>2</sup>) did not  
764 influence overall findings, as detected forest cover change scaled proportionately with cell size  
765 across locations (Extended Data Figure 10a-b). Landscape context (forest cover in a 500 km<sup>2</sup>  
766 cell around sites) also did not influence the relationship between forest cover change and  
767 population and biodiversity change (Extended Data Figure 10c-d). We did not find directional  
768 patterns between population and biodiversity change and time since the largest forest loss event  
769 (Extended Data Figure 10f-h). Our findings were not influenced by the type of forest cover  
770 (primary vs secondary), as loss of secondary forest cover scaled proportionately to primary  
771 forest loss (Extended Data Figure 10e).

772

### 773 **Supplementary methods references**

- 774 48. Gorelick, N. *et al.* Google Earth Engine: Planetary-scale geospatial analysis for everyone.  
775 *Remote Sens. Environ.* **202**, 18–27 (2017).
- 776 49. Curtis, P. G., Slay, C. M., Harris, N. L., Tyukavina, A. & Hansen, M. C. Classifying drivers  
777 of global forest loss. *Science* **361**, 1108–1111 (2018).
- 778 50. Knappe, J., Jonzén, N. & Sköld, M. On observation distributions for state space models of  
779 population survey data: Observation models for population data. *J. Anim. Ecol.* **80**, 1269–  
780 1277 (2011).
- 781 51. Pedersen, M. W., Berg, C. W., Thygesen, U. H., Nielsen, A. & Madsen, H. Estimation  
782 methods for nonlinear state-space models in ecology. *Ecol. Model.* **222**, 1394–1400  
783 (2011).
- 784 52. van de Pol, M. & Wright, J. A simple method for distinguishing within- versus between-  
785 subject effects using mixed models. *Anim. Behav.* **77**, 753–758 (2009).

- 786 53. Bürkner, P.-C. brms: An R Package for Bayesian Multilevel Models Using Stan. *J. Stat.*  
787 *Softw.* **80**, (2017).
- 788 54. Ferrari, S. & Cribari-Neto, F. Beta Regression for Modelling Rates and Proportions. *J.*  
789 *Appl. Stat.* **31**, 799–815 (2004).
- 790 55. Pacifici, M. *et al.* Generation length for mammals. *Nat. Conserv.* **5**, 89–94 (2013).
- 791 56. R Core Team. R: A language and environment for statistical computing. R Foundation for  
792 Statistical Computing, Vienna, Austria. URL <https://www.R-project.org/>. (2017).

793

794 **Data and code availability**

795 Code for the rarefaction of the BioTIME Database is available from  
796 <https://doi.org/10.5281/zenodo.1475218>. Code for statistical analyses is available from  
797 <http://doi.org/10.5281/zenodo.1490144>. Population and biodiversity data are freely available in  
798 the Living Planet and BioTIME Databases<sup>12,13</sup>. The Living Planet Database can be accessed on  
799 [http://www.livingplanetindex.org/data\\_portal](http://www.livingplanetindex.org/data_portal). The BioTIME Database can be accessed on  
800 Zenodo (<https://doi.org/10.5281/zenodo.1211105>) or through the BioTIME website  
801 (<http://biotime.st-andrews.ac.uk/>). Land-use change data are publicly available in the Land Use  
802 Harmonization Database<sup>30</sup>, the Forest Cover Change Database<sup>31</sup>, and the MODIS Landcover  
803 Database<sup>32</sup>.
